# Supplementary material
Source: PubMed Central journal article supplement (PMC5988432)
Supplement: NIHMS970292-supplement-Supplement.pdf [file NIHMS970292-supplement-Supplement.pdf]

# Psychiatric Services

## THE BENEFITS OF INCORPORATING PEER-TO-PEER INTERACTIONS INTO DIGITAL INTERVENTIONS FOR PSYCHOTIC DISORDERS: A SYSTEMATIC REVIEW

|                     |                                                                                     |
|---------------------|-------------------------------------------------------------------------------------|
| Journal:            | <i>Psychiatric Services</i>                                                         |
| Manuscript ID       | APPI-PS-2017-00283.R1                                                               |
| Manuscript Type:    | Reviews & Overviews                                                                 |
| Subject Categories: | Psychoses - PS0227, Computer technology - PS0070, Service delivery systems - PS0251 |
|                     |                                                                                     |

SCHOLARONE™  
Manuscripts

For Review Only

Table 1. Characteristics of included studies.

| Studies                                                                       | Author(s), year, location                                                                                  | Intervention                                                                                                                                                                                                                                                                 | Study design                                                     | Duration            | Retention                                     | Adherence                                                                                                                                                                                                                                                                                                                                                                                                                                                             | User experience                                                                                                                                                                                                                                                                                                        | Reported benefits                                                                                                                                                                                                                                                                                |
|-------------------------------------------------------------------------------|------------------------------------------------------------------------------------------------------------|------------------------------------------------------------------------------------------------------------------------------------------------------------------------------------------------------------------------------------------------------------------------------|------------------------------------------------------------------|---------------------|-----------------------------------------------|-----------------------------------------------------------------------------------------------------------------------------------------------------------------------------------------------------------------------------------------------------------------------------------------------------------------------------------------------------------------------------------------------------------------------------------------------------------------------|------------------------------------------------------------------------------------------------------------------------------------------------------------------------------------------------------------------------------------------------------------------------------------------------------------------------|--------------------------------------------------------------------------------------------------------------------------------------------------------------------------------------------------------------------------------------------------------------------------------------------------|
| UNNAMED                                                                       | Kaplan et al., 2011, <sup>13</sup> U.S.                                                                    | 2 intervention groups: unmoderated internet peer support listserv (n=101) unmoderated peer support bulletin board (n=99), groups merged in the analysis vs waiting list (n=100)                                                                                              | RCT: 2 conditions: Peer support forum; Waiting list              | 12 months           | 18% listserv, 10%bulletin board, 12% waitlist | 57/190 (30%) reported having read the messages at least weekly and sent at least 5 messages at the 12 month post baseline point                                                                                                                                                                                                                                                                                                                                       | Perceived relevance, perceived support and satisfaction in the experimental groups were in the mid-range (3.1/6). Participants in the high participation group had significantly higher scores than those who participated less                                                                                        | No differences between 3 groups on quality of life, empowerment scale, and symptoms                                                                                                                                                                                                              |
| <b>Schizophrenia Online Access to Resources (SOAR)*</b>                       | Rotondi et al., 2005, 2010, <sup>14,15</sup> U.S.                                                          | In-person psychoeducation followed by online psychoeducation, therapy groups, moderated peer discussion forums and questions via email                                                                                                                                       | RCT: 2 conditions: Telehealth website; Usual care                | 18 months           | 97% retention rate in the experimental arm    | 16/16 (100%) 'engaged' with treatment (contribution in forum on ≥13 visits & use of educational material on ≥4 visits).<br><br>the mean number of therapy forum page views: 1,838 (2,795); the mean number of views on the questions page: 113 (217); the mean number of views on article page: 69 (59)<br><br>the mean amount of time spent online the SOAR therapy forum: 1,874 (2,728); the mean amount of time spent on the educational questions page: 124 (198) | Nearly half of the participants with schizophrenia reported feeling some level of stress (44.7%)<br><br>68.8% to 81.4% participants found SOAR <i>moderately to extremely</i> easy to use.<br><br>93.8% participants would have liked to be involved in SOAR after study conclusion                                    | Reduction in positive symptoms, improvements in perceived social support and stress, and increase in schizophrenia knowledge in intervention group                                                                                                                                               |
|                                                                               | Rotondi et al., 2015, <sup>16</sup> U.S.                                                                   | As above                                                                                                                                                                                                                                                                     | Usability testing of SOAR compared with other websites           | N/A                 |                                               | N/A                                                                                                                                                                                                                                                                                                                                                                                                                                                                   | Participant ratings (n = 38) 4.0/5 – mean rating for 'easy to use'                                                                                                                                                                                                                                                     | Easiest application to use of the 5 websites reviewed                                                                                                                                                                                                                                            |
| <b>HORYZONS</b>                                                               | Alvarez-Jimenez et al., 2013, <sup>17</sup> Australia<br><br>Gleeson et al., 2013, <sup>18</sup> Australia | Online interactive psychosocial interventions & moderated social networking                                                                                                                                                                                                  | Uncontrolled pilot study (quantitative and qualitative analysis) | 4 weeks (7 modules) | 100%                                          | 12/20 - used HORYZONS for full 4 weeks (60%);<br>14/20 - used HORYZONS for ≥3 weeks (70%).<br>3/20 - completed all 7 modules (15%);<br>9/20 - completed ≥4 modules (45%);<br>12/20 - completed ≥3 modules (60%);<br>19/20 - completed ≥1 module (95%)<br><br>95% used the social network with a total of 371 postings and 4170 social page views or actions                                                                                                           | 15/20 - had a positive experience (75%);<br>18/20 - would recommend to others (90%);<br>14/20 - felt it would be a useful long-term treatment option (70%).<br><br>20/20 - 'agreed' or 'strongly agreed' that HORYZONS was safe & confidential (100%);<br><br>18/20 - felt moderation had contributed to safety (90%). | after 1-month using the online platform:<br><br>moderate to large reductions in depression.<br><br>60% of patients reported increased perceived social connectedness and<br><br>55% felt empowerment in their recovery process<br><br>70% found the system to be useful, beyond their discharge. |
| <b>Personalized Real-Time Intervention for Motivation Enhancement (PRIME)</b> | Schlosser et al., 2016, <sup>19</sup> U.S.                                                                 | SMS-based motivational coaching from trained therapists; individualized goal setting in various psychosocial domains; and social networking via direct peer-to-peer messaging, community "moments feed" to capture and reinforce rewarding experiences and goal achievements | Uncontrolled pilot study                                         | 12-weeks            | 100%                                          | average number of logins per week: 4.1, challenge completion rate (%): 84.9%, average number of user-initiated peer interactions: 74.2, average number of user-initiated coach interactions: 56.6, average number of challenges completed: 19.4, average times active per week: 7.52.                                                                                                                                                                                 | Mean overall satisfaction 8/10                                                                                                                                                                                                                                                                                         | n/a                                                                                                                                                                                                                                                                                              |

|                                                                                                                                 |                                                                         |                                                                                                                                                                             |                                            |                   |               |                                                                                                                                                                                                              |                                                                                                                                                                                                                                                   |                                                                                                                                                                                                                                                                                           |
|---------------------------------------------------------------------------------------------------------------------------------|-------------------------------------------------------------------------|-----------------------------------------------------------------------------------------------------------------------------------------------------------------------------|--------------------------------------------|-------------------|---------------|--------------------------------------------------------------------------------------------------------------------------------------------------------------------------------------------------------------|---------------------------------------------------------------------------------------------------------------------------------------------------------------------------------------------------------------------------------------------------|-------------------------------------------------------------------------------------------------------------------------------------------------------------------------------------------------------------------------------------------------------------------------------------------|
| <p>1 <b>Creating Live</b><br/> 2 <b>interactions</b><br/> 3 <b>to Mitigate</b><br/> 4 <b>Barriers</b><br/> 5 <b>(CLIMB)</b></p> | <p>6 Biagianni<br/> 7 et al.,<br/> 8 2016,<sup>20</sup><br/> 9 U.S.</p> | <p>10 Computerized social<br/> 11 cognition training<br/> 12 program, remote<br/> 13 weekly group<br/> 14 therapy sessions,<br/> 15 and moderated<br/> 16 group texting</p> | <p>17 Uncontrolled<br/> 18 pilot study</p> | <p>19 6 weeks</p> | <p>20 78%</p> | <p>21 Participants attended 84% of the group<br/> 22 therapy sessions, completed a median of 9.5<br/> 23 hours of training, and posted a median of 5.2<br/> 24 messages per week on the group text chat.</p> | <p>25 Participant ratings (n=21)<br/> 26 Enjoyment/Satisfaction<br/> 27 2.99/5<br/> 28 Program Clarity / Ease of use<br/> 29 4.18<br/> 30 /5<br/> 31 Ease of fit into daily schedule<br/> 32 2.91/5<br/> 33 Perceived benefits<br/> 34 3.25/5</p> | <p>35 Significant pre-<br/> 36 to post<br/> 37 improvements<br/> 38 in social<br/> 39 emotion<br/> 40 identification<br/> 41 abilities.<br/> 42 Trend-level<br/> 43 improvements<br/> 44 on aspects of<br/> 45 quality of life.<br/> 46 No<br/> 47 improvements<br/> 48 for symptoms.</p> |
|---------------------------------------------------------------------------------------------------------------------------------|-------------------------------------------------------------------------|-----------------------------------------------------------------------------------------------------------------------------------------------------------------------------|--------------------------------------------|-------------------|---------------|--------------------------------------------------------------------------------------------------------------------------------------------------------------------------------------------------------------|---------------------------------------------------------------------------------------------------------------------------------------------------------------------------------------------------------------------------------------------------|-------------------------------------------------------------------------------------------------------------------------------------------------------------------------------------------------------------------------------------------------------------------------------------------|

9 a Study included data from caregivers or clinicians, or both; results from these participants are not reported in this review.  
10 US: United States; RCT: Randomized Clinical Trial

11  
12  
13  
14  
15  
16  
17  
18  
19  
20  
21  
22  
23  
24  
25  
26  
27  
28  
29  
30  
31  
32  
33  
34  
35  
36  
37  
38  
39  
40  
41  
42  
43  
44  
45  
46  
47  
48  
49  
50  
51  
52  
53  
54  
55  
56  
57  
58  
59  
60

For Review Only
